# Supplementary material for: Tissue and cellular spatiotemporal dynamics in colon aging
Source: PubMed Central journal article supplement (PMC11071407; doi:10.1101/2024.04.22.590125), 2024-04-26

# Extended Figure 2

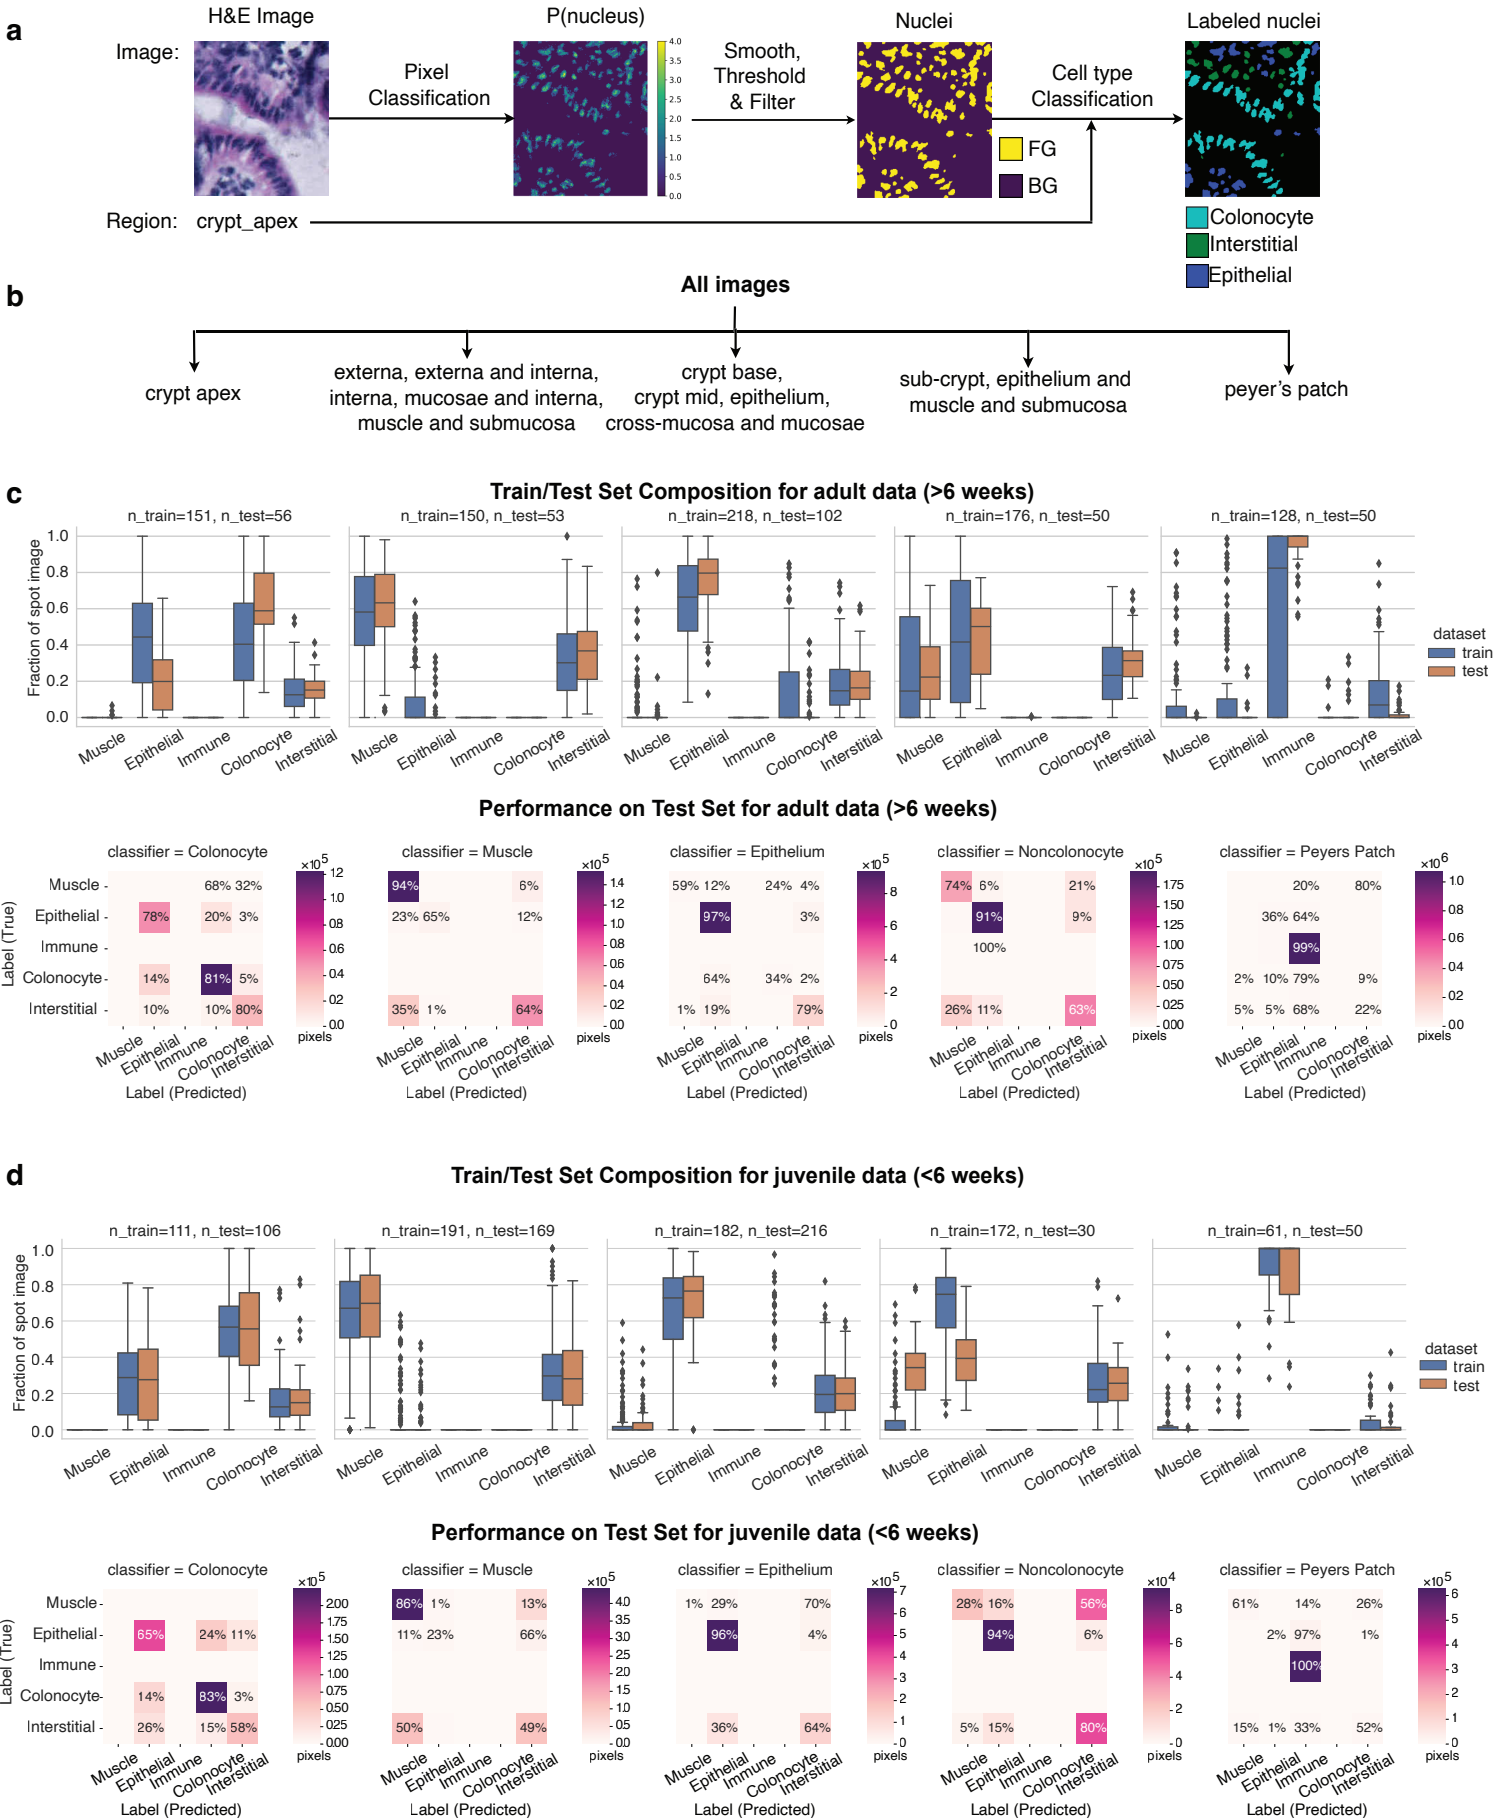

# Extended Figure 3

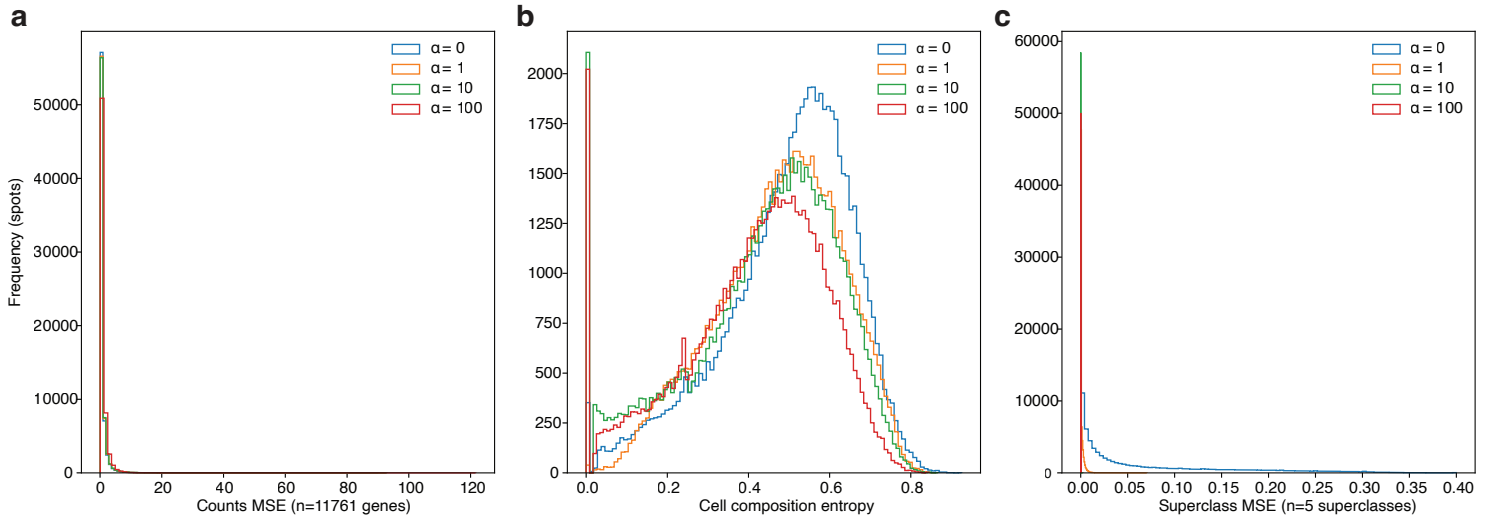

# Extended Figure 4

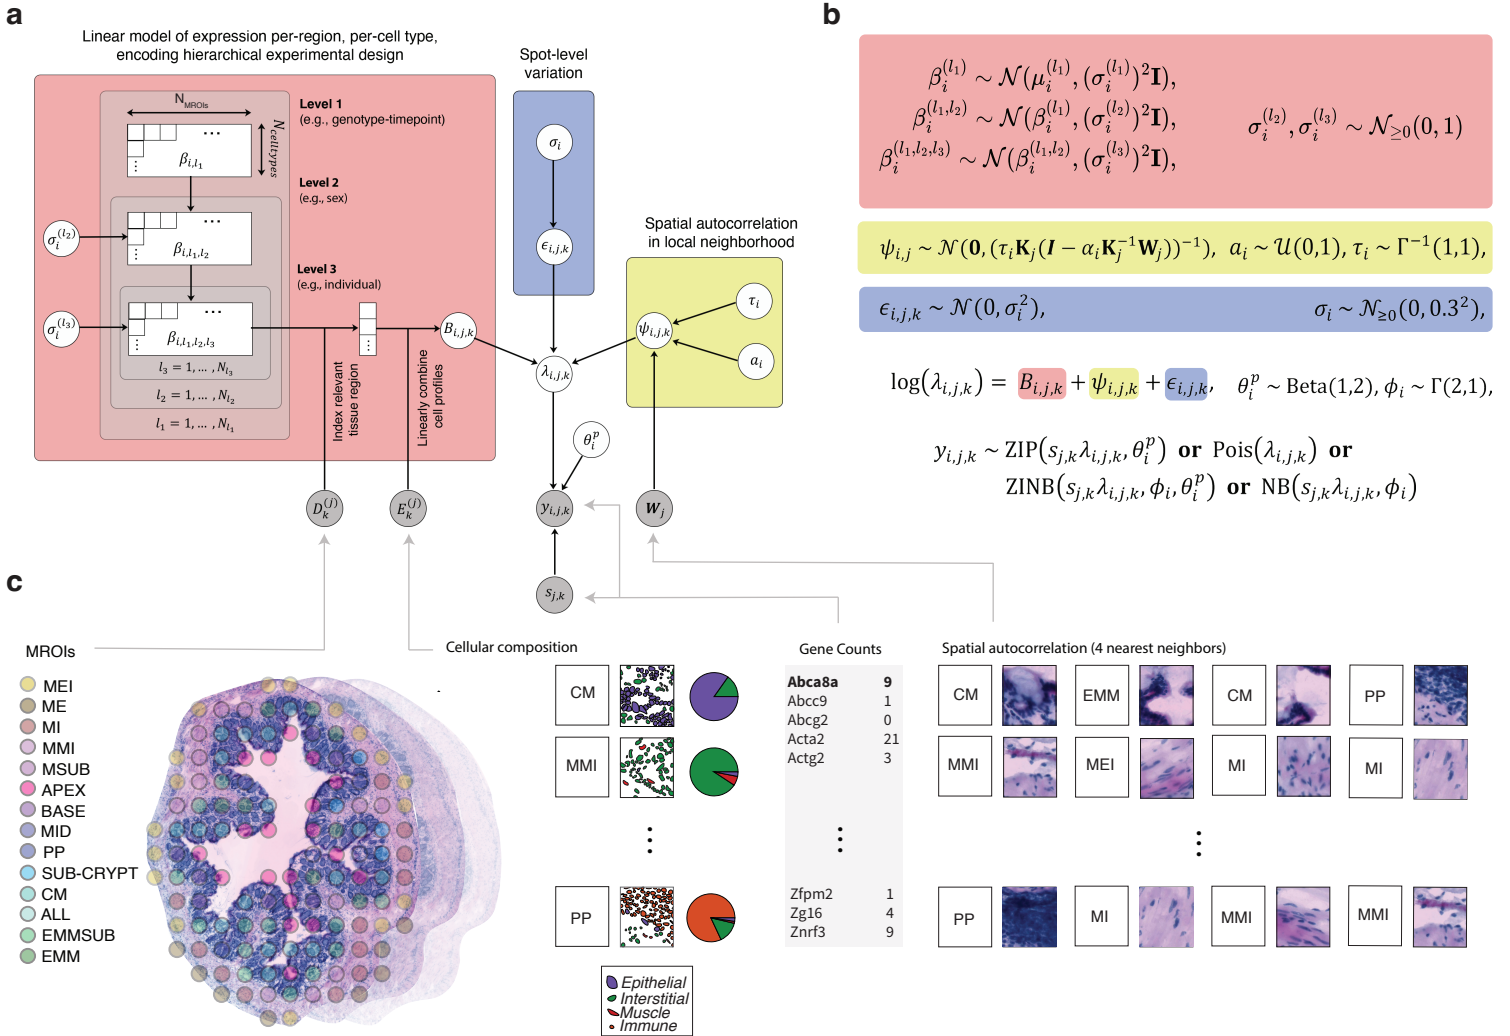

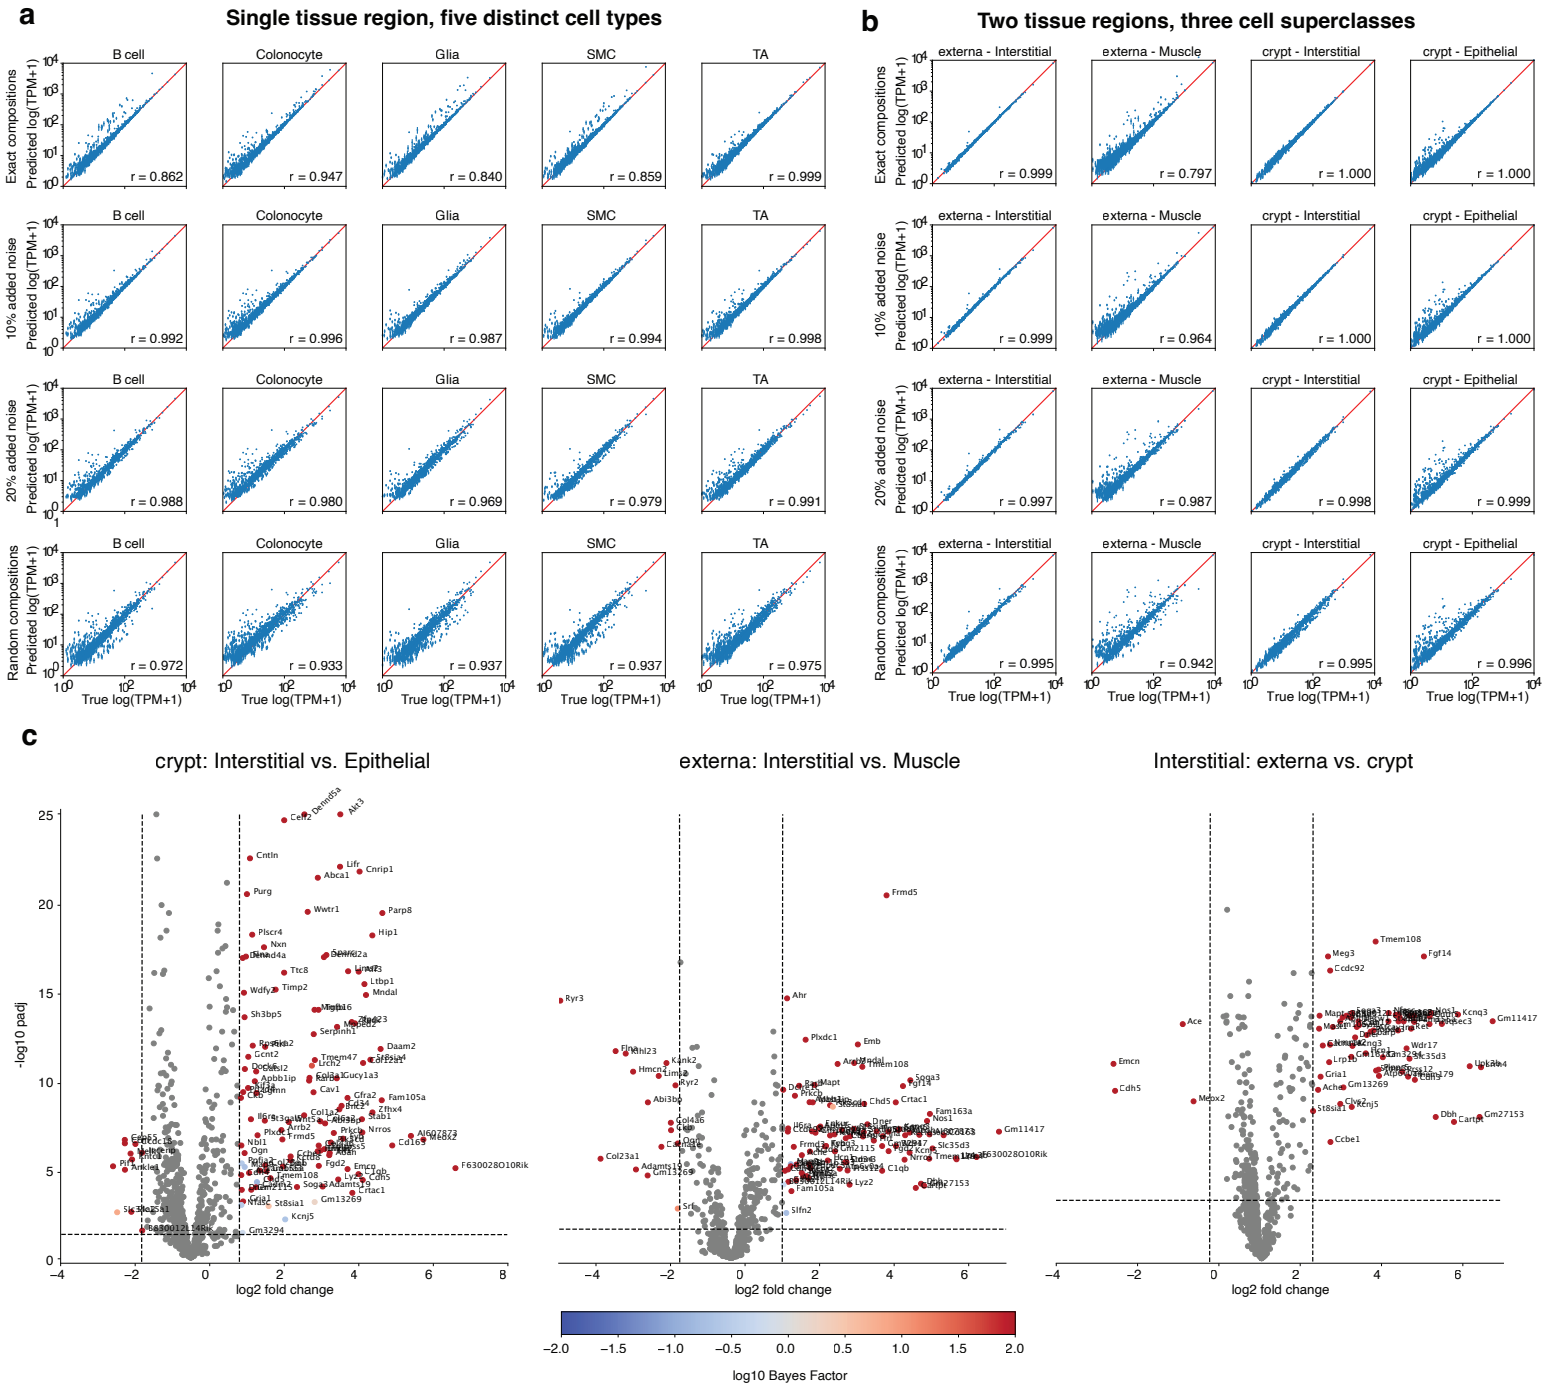

# Extended Figure 6

**a**

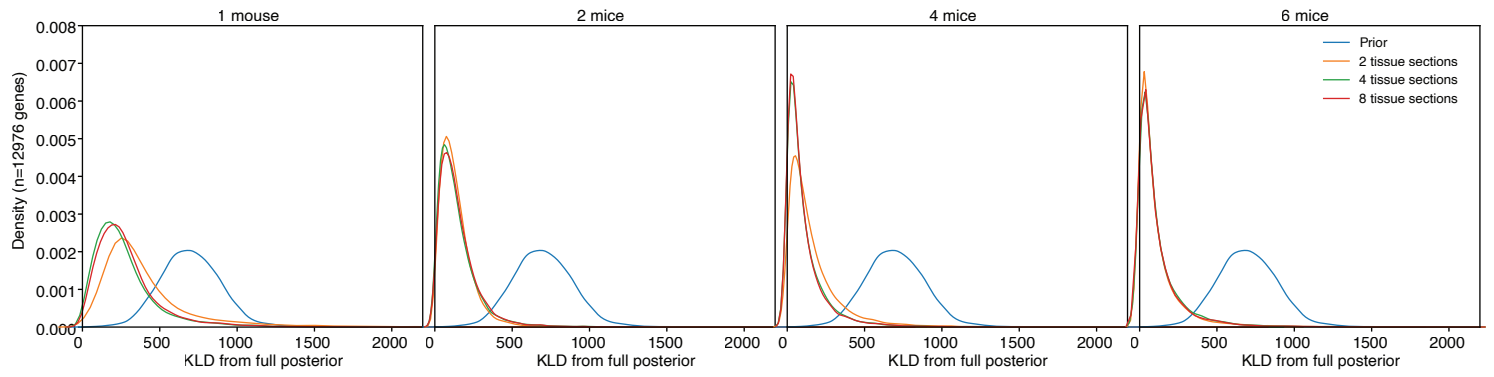

**b**

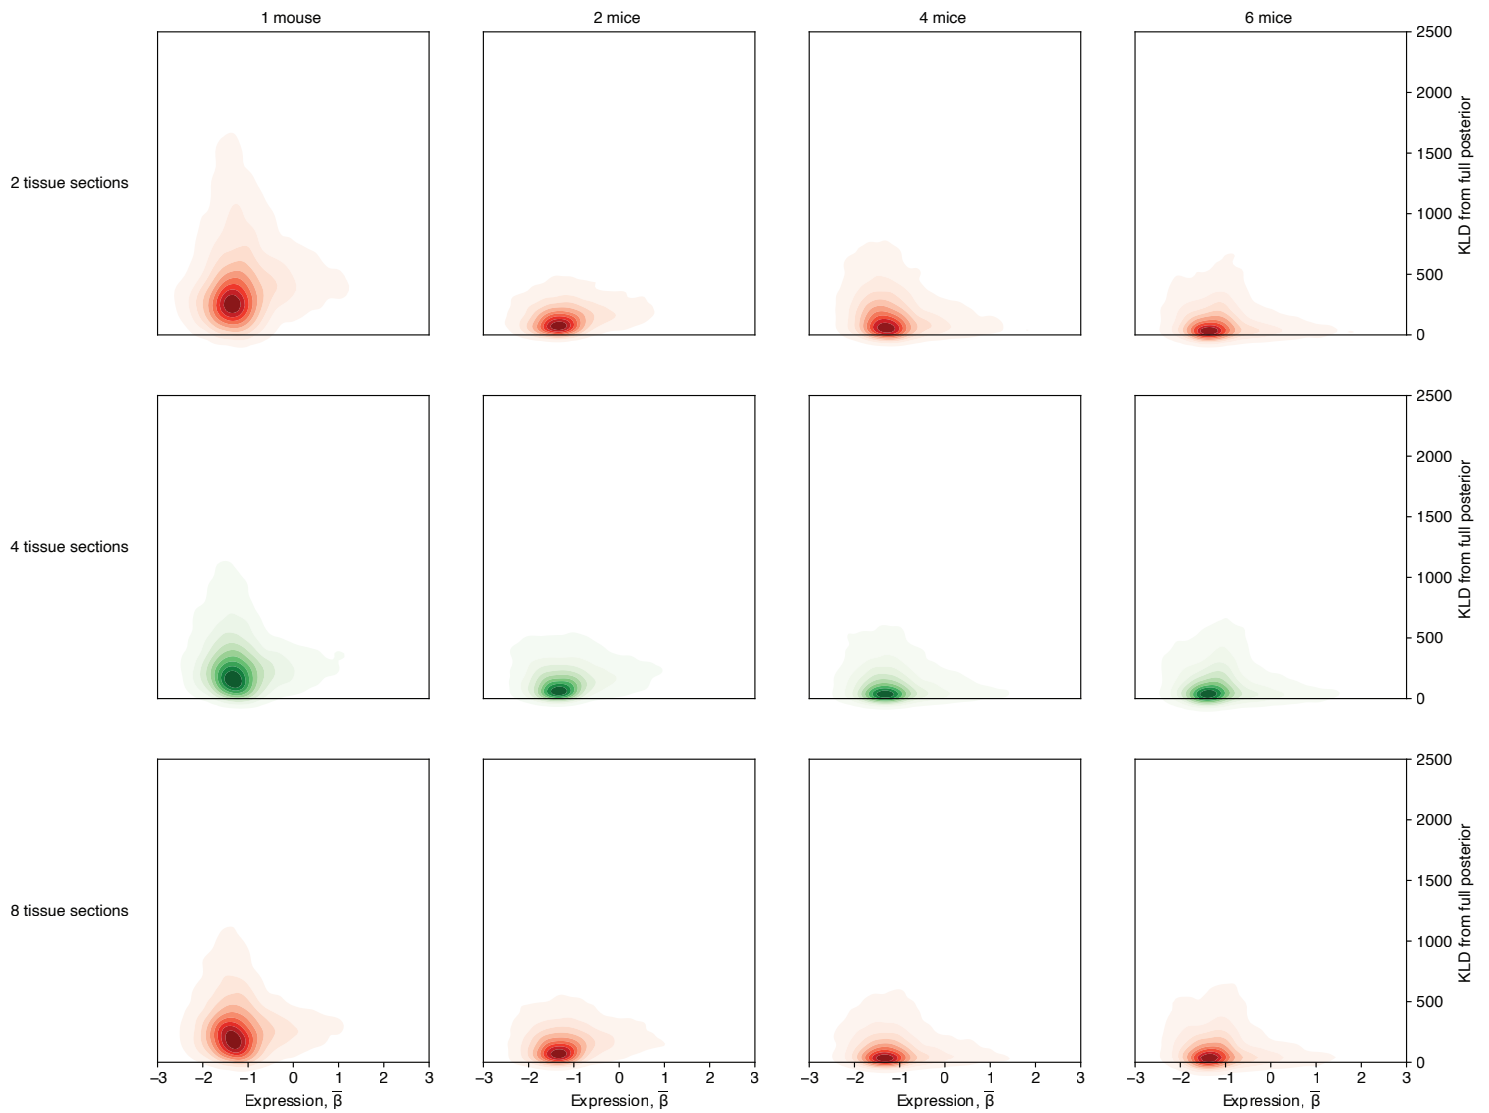

# Extended Figure 7

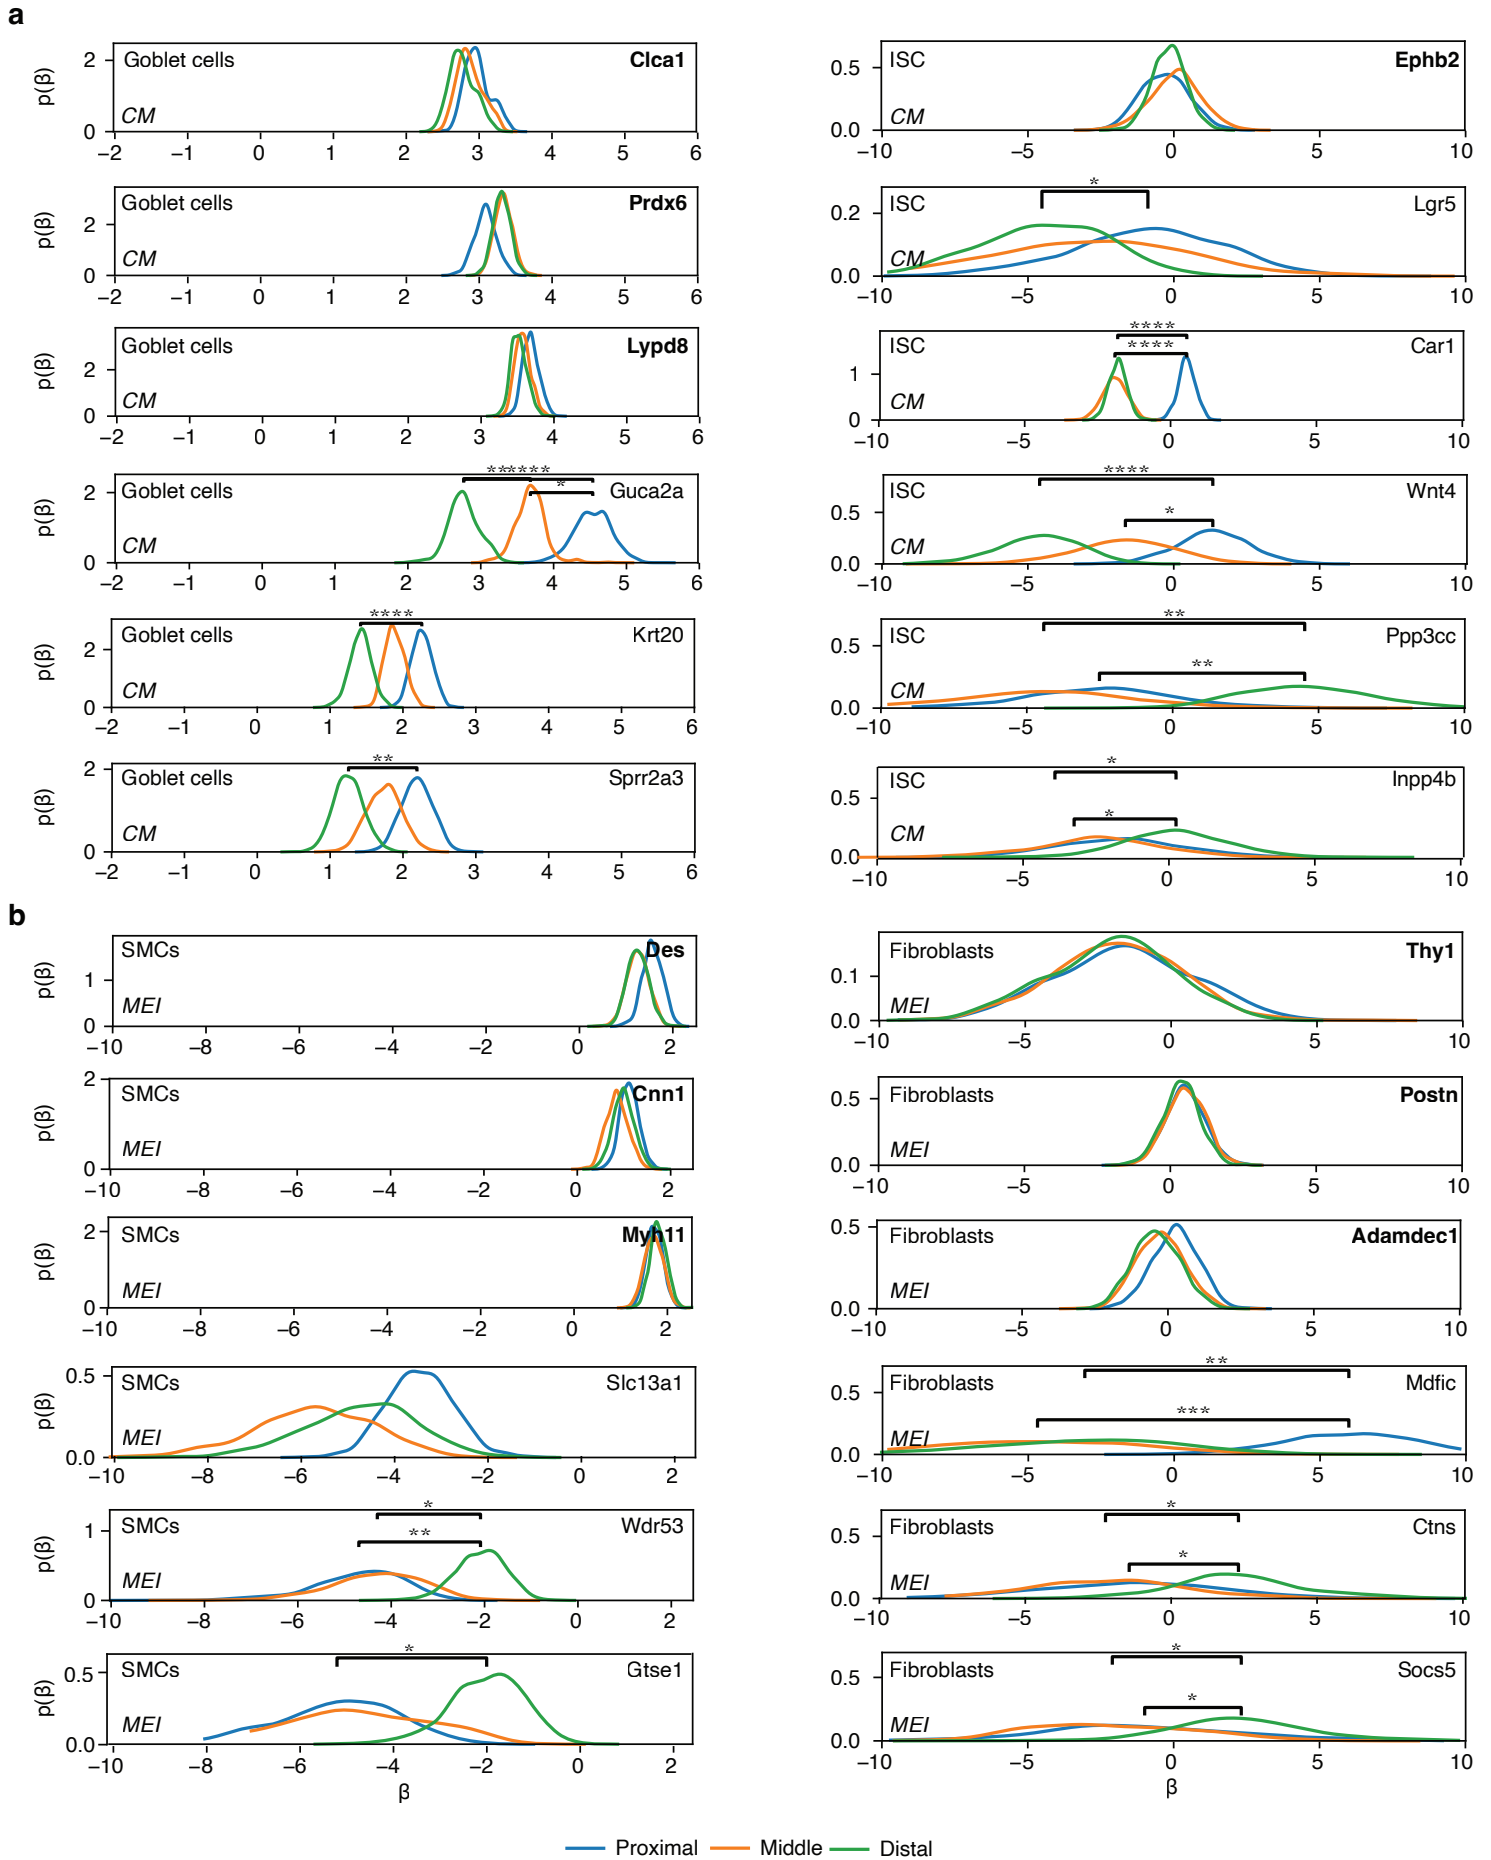

# Extended Figure 8

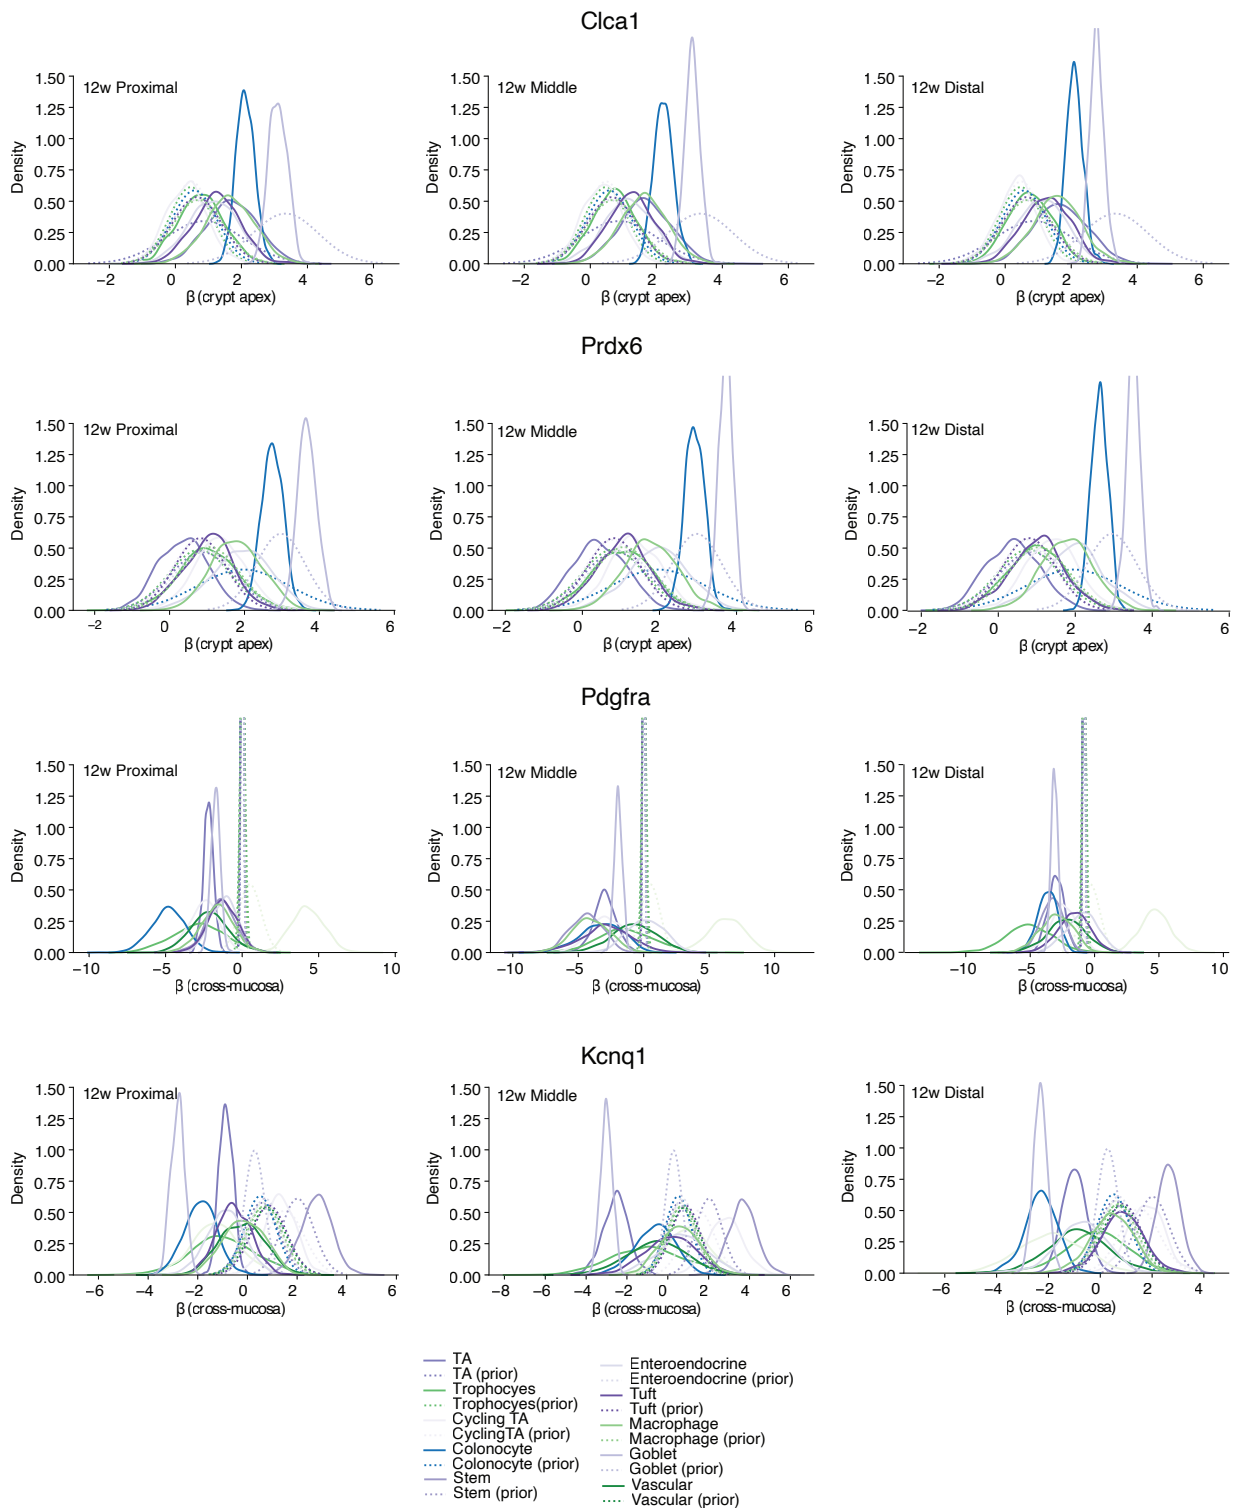



Extended Figure 9

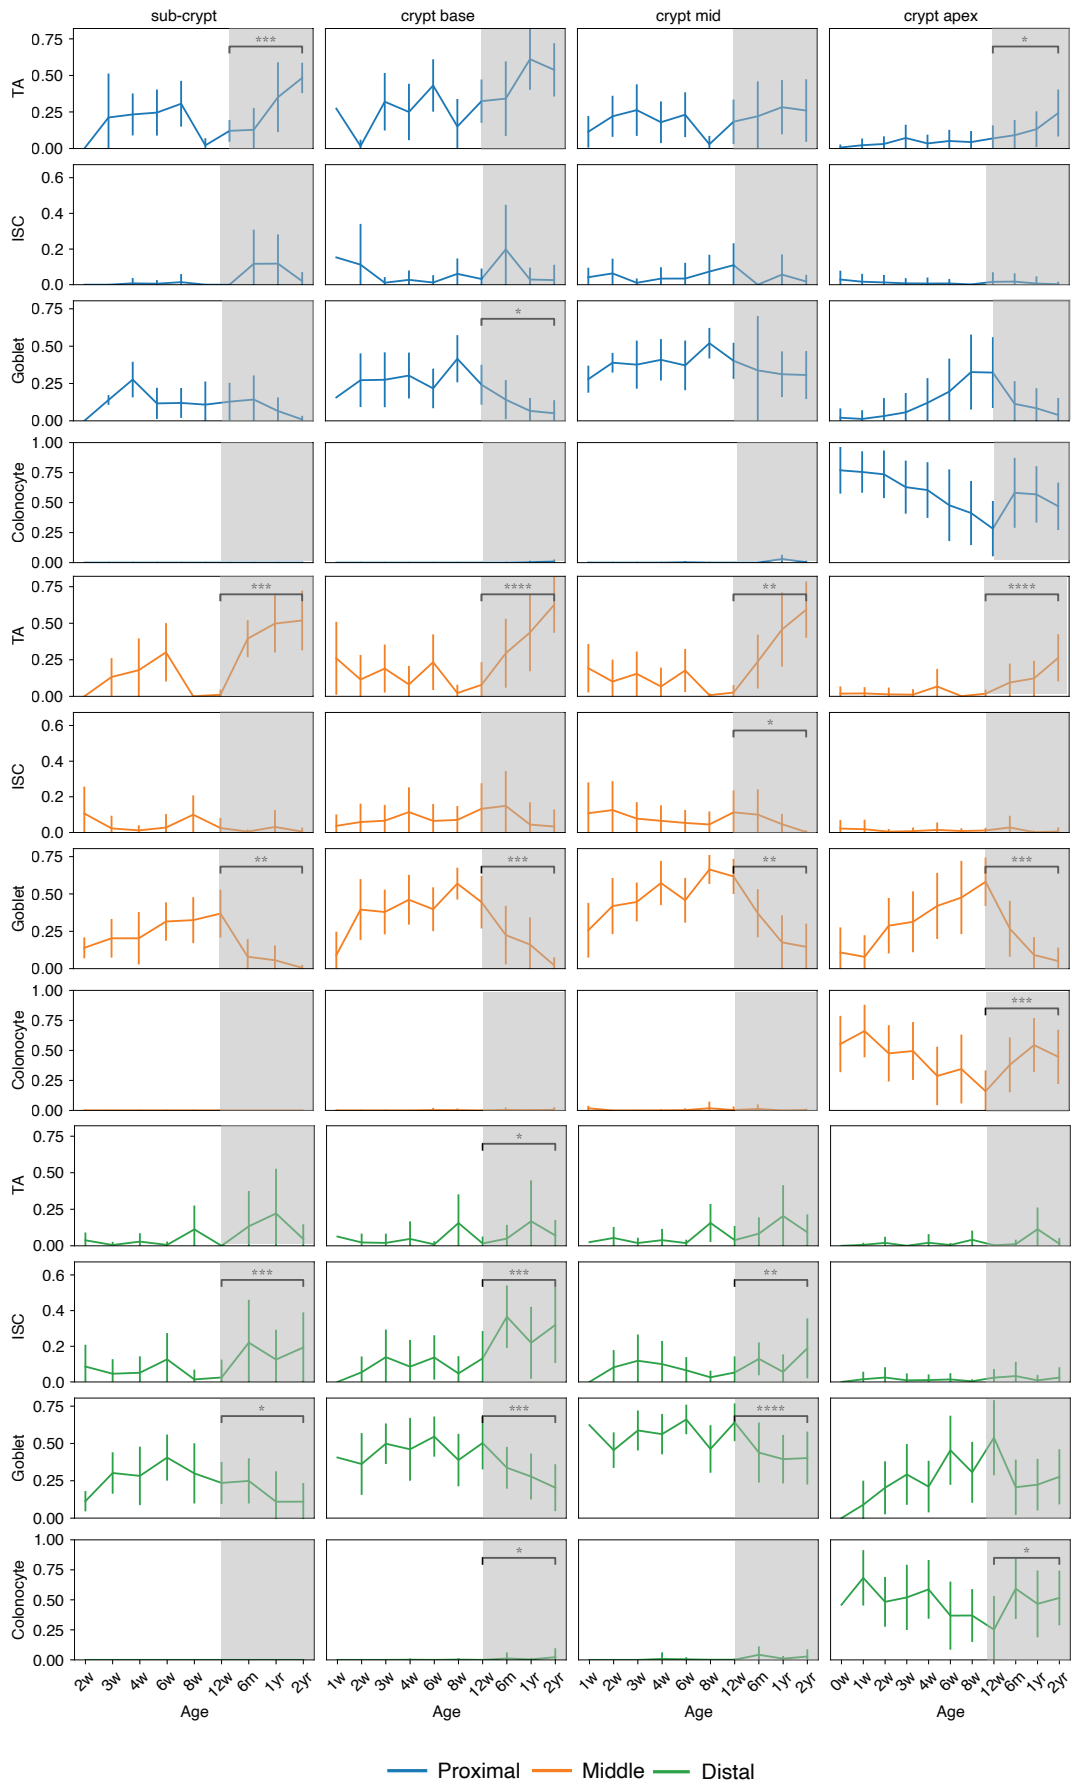

Supplement: media-1.pdf [file media-1.pdf]
